# Supplementary material for: Elevated Serum Carcinoembryonic Antigen Is Associated with a Worse Survival Outcome of Patients After Liver Resection for Hepatocellular Carcinoma: a Propensity Score Matching Analysis
Source: Springer Nature journal article supplement (doi:10.1007/s11605-016-3295-8), 2016-10-11
Supplement: MOESM1 [file 10864174]

**Supplement Table 1. Univariable Cox regression analysis of prognostic factors in the entire patients**

| **Variable** | **OS** | | | **Tumor recurrence** | | |
| --- | --- | --- | --- | --- | --- | --- |
| **P-value** | **HR** | **95%CI** | **P-value** | **HR** | **95%CI** |
| Age, years, ≥60 vs. <60 | 0.846 | 1.011 | 0.909-1.123 | 0.414 | 0.963 | 0.880-1.054 |
| Sex, Male vs. Femal | 0.076 | 0.897 | 0.796-1.011 | 0.040 | 1.120 | 1.005-1.248 |
| Smoking, Yes vs. No | 0.619 | 1.024 | 0.934-1.122 | 0.071 | 1.074 | 0.994-1.160 |
| Diabetes, Yes vs. No | 0.299 | 1.099 | 0.920-1.312 | 0.476 | 0.944 | 0.804-1.107 |
| HBsAg, Positive vs. Negative | 0.007 | 1.215 | 1.055-1.400 | <0.001 | 1.241 | 1.101-1.398 |
| HBeAg, Positive vs. Negative | 0.463 | 1.037 | 0.941-1.144 | 0.006 | 1.120 | 1.032-1.215 |
| PLT, ×10^9/L, ≥300 vs. <300 | 0.165 | 1.171 | 0.937-1.463 | 0.360 | 0.909 | 0.741-1.115 |
| PT, S, ≥13 vs. <13 | 0.590 | 1.032 | 0.920-1.158 | 0.141 | 0.928 | 0.841-1.025 |
| TBIL, mg/dL, ≥1.0 vs. <1.0 | 0.079 | 1.095 | 0.990-1.212 | 0.740 | 1.015 | 0.931-1.106 |
| Alb, g/dL, ≥3.5 vs. <3.5 | 0.009 | 0.794 | 0.668-0.943 | 0.390 | 0.934 | 0.800-1.091 |
| ALT, U/L, ≥80 vs. <80 | 0.413 | 1.060 | 0.922-1.218 | 0.148 | 1.090 | 0.970-1.226 |
| AFP, µg/L, ≥20 vs. <20 | <0.001 | 1.587 | 1.438-1.752 | <0.001 | 1.345 | 1.241-1.458 |
| CEA, µg/L, ≥5.1vs. <5.1 | <0.001 | 1.361 | 1.185-1.562 | <0.001 | 1.343 | 1.192-1.514 |
| CA 19-9, U/mL, ≥39 vs. <39 | <0.001 | 1.404 | 1.266-1.557 | <0.001 | 1.243 | 1.136-1.361 |
| Transfusion, Yes vs. No | 0.398 | 1.057 | 0.929-1.203 | 0.427 | 0.955 | 0.854-1.069 |
| Hilar clamping, minutes, ≥20 vs. <20 | 0.019 | 1.377 | 1.055-1.796 | 0.306 | 1.135 | 0.891-1.447 |
| Cirrhosis, Yes vs. No | 0.014 | 1.124 | 1.024-1.233 | 0.004 | 1.121 | 1.037-1.212 |
| Tumor size, cm , ≥5 vs. <5 | <0.001 | 1.794 | 1.638-1.965 | <0.001 | 1.471 | 1.363-1.587 |
| Tumor number, Multiple vs. Solitary | <0.001 | 1.703 | 1.547-1.874 | <0.001 | 1.543 | 1.421-1.677 |
| Microvascular invasion, Yes vs. No | <0.001 | 1.400 | 1.275-1.537 | <0.001 | 1.213 | 1.122-1.310 |
| LNM, Yes vs. No | <0.001 | 2.045 | 1.588-2.635 | 0.119 | 1.234 | 0.947-1.608 |
| Differentiation, IV/III vs. II/I | <0.001 | 1.763 | 1.576-1.972 | <0.001 | 1.417 | 1.297-1.548 |

HBsAg, hepatitis B surface antigen; HBeAg, hepatitis Be Antigen; PLT, platelets; PT, prothrombin time; TBIL, total bilirubin; Alb, Albumin (g/L); ALT, alanine aminotransferase; AFP, alfa-fetoprotein; CEA, carcinoembryonic antigen; CA 19-9, carbohydrate antigen 19-9; LNM, lymph node metastasis.
